# Supplementary material for: A new conformational polymorph of N-acetyl-l-cysteine. The role of S–H⋯O and C–H⋯O interactions
Source: Royal Society of Chemistry journal article supplement (doi:10.1039/c3ce40879e), 2013-01-01
Supplement: c3ce40879e.pdf [file c3ce40879e.pdf]

## A new conformational polymorph of N-acetyl-L-cysteine. The role of S–H···O and C–H···O interactions†

S. Sudalai Kumar, and Ashwini Nangia\*

School of Chemistry, University of Hyderabad, Central University PO, Prof. C. R. Rao Road,  
Gachibowli, Hyderabad 500 046, India

E-mail [ashwini.nangia@gmail.com](mailto:ashwini.nangia@gmail.com)

### Electronic Supplementary Information†

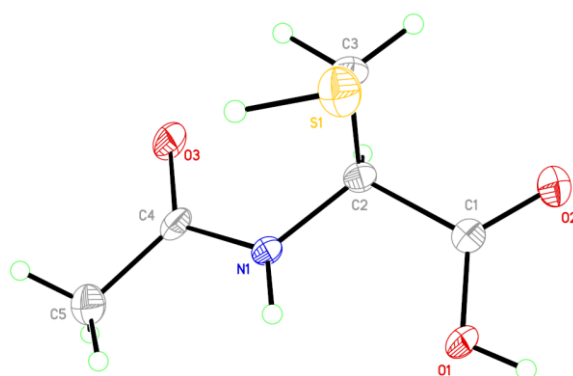

**Fig. S1** ORTEP of form I NAC.

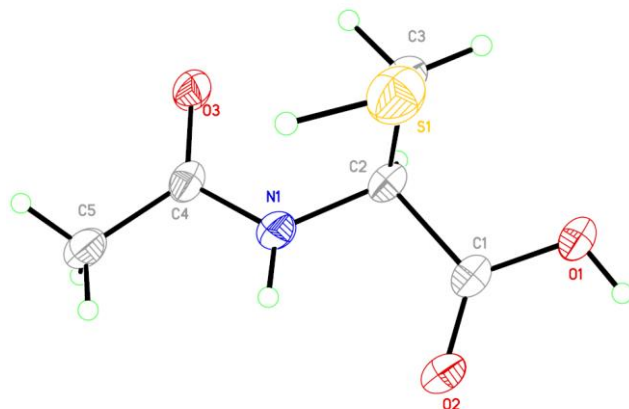

**Fig. S2** ORTEP of form II NAC.

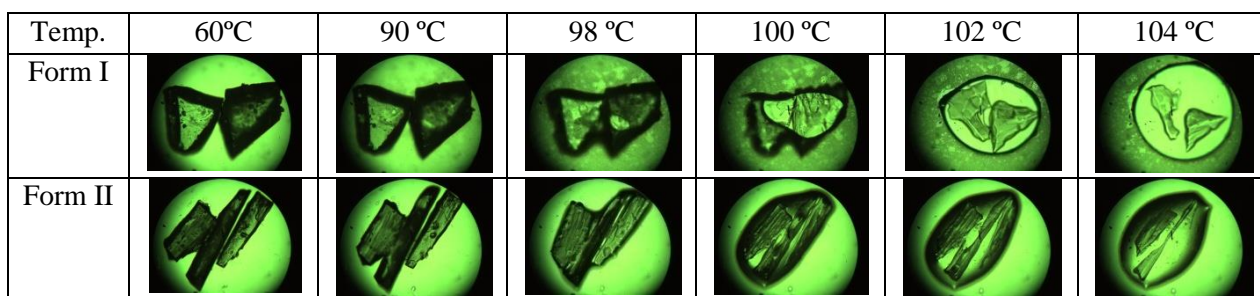

Fig. S3 HSM images of polymorphs I and II of NAC upon heating.

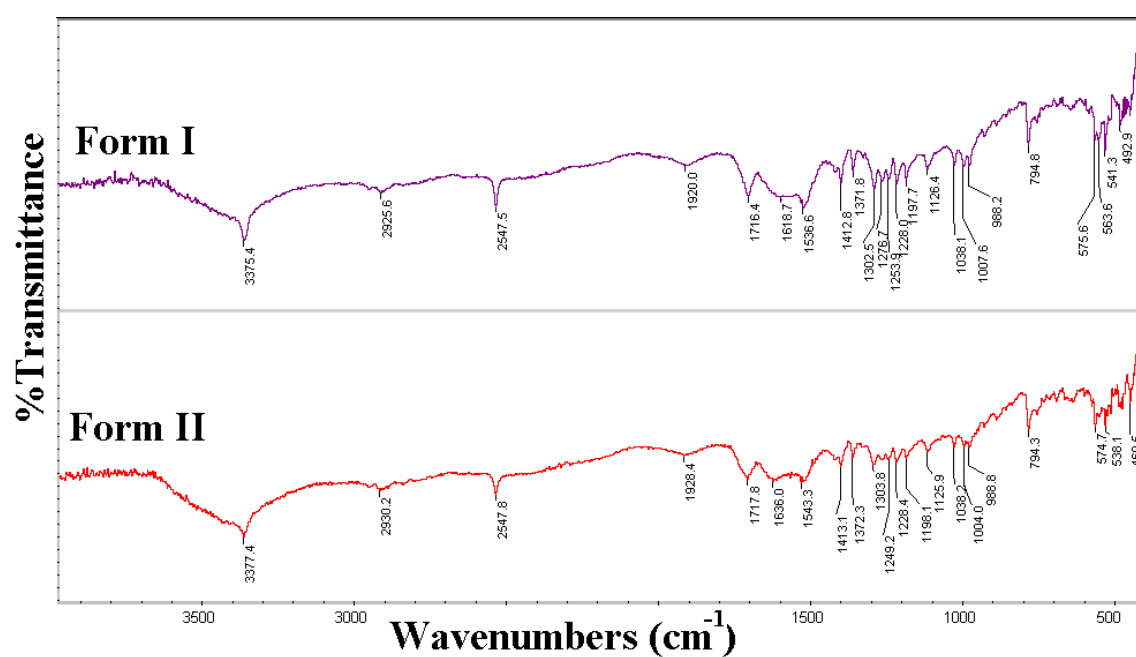

Fig. S4 FT-IR of form I and form II of NAC.

Table S1 Vibrational stretching frequency of NAC polymorphs.

| FT-IR<br>(cm <sup>-1</sup> ) | N-H<br>stretch | C-H<br>stretch | Carboxylic<br>C=O stretch | Carboxamide<br>C=O stretch | S-H<br>stretch | N-H<br>bend |
|------------------------------|----------------|----------------|---------------------------|----------------------------|----------------|-------------|
| Form I                       | 3375.4         | 2925.6         | 1716.4                    | 1618.7                     | 2547.5         | 1371.8      |
| Form II                      | 3377.4         | 2930.2         | 1717.8                    | 1636.0                     | 2547.8         | 1372.3      |

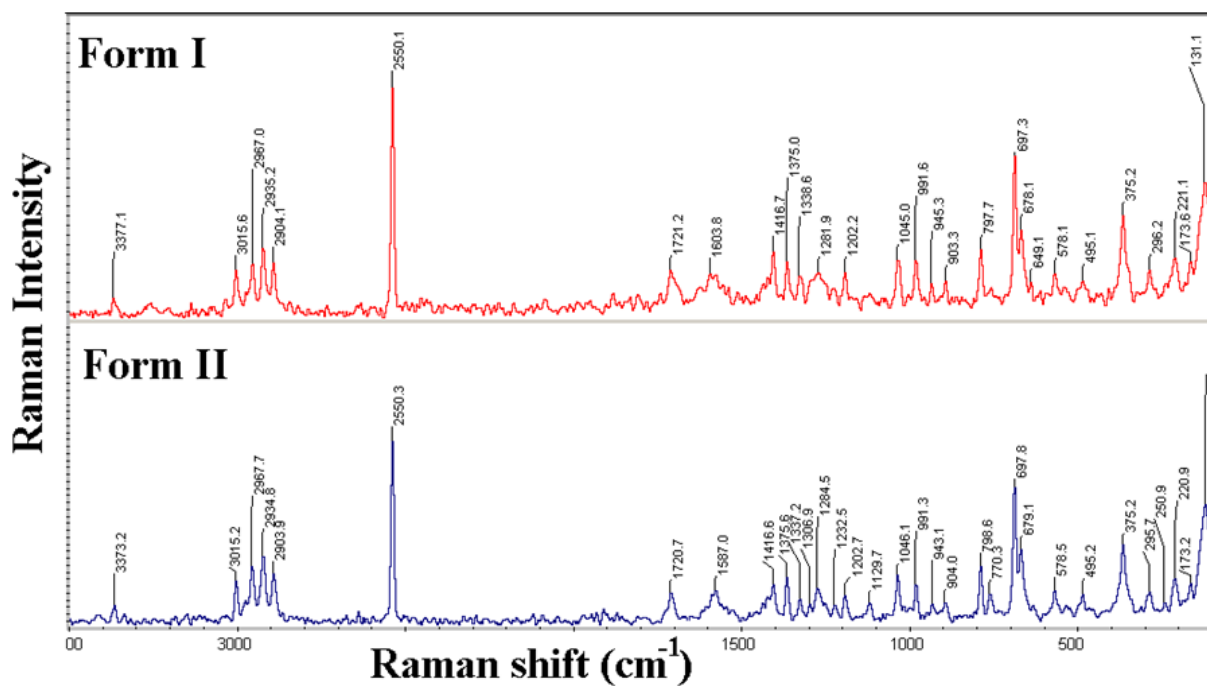

**Fig. S5** FT-Raman spectra NAC polymorphs.

**Table S2** Raman stretching frequency of NAC polymorphs.

| FT-Raman (cm <sup>-1</sup> ) | N-H stretch | C-H stretch | Carboxylic C=O stretch | Carboxamide C=O stretch | S-H stretch | N-H bend |
|------------------------------|-------------|-------------|------------------------|-------------------------|-------------|----------|
| Form I                       | 3377.1      | 2935.2      | 1721.2                 | 1603.8                  | 2550.1      | 1375.0   |
| Form II                      | 3373.2      | 2934.8      | 1720.7                 | 1587.0                  | 2550.3      | 1375.6   |

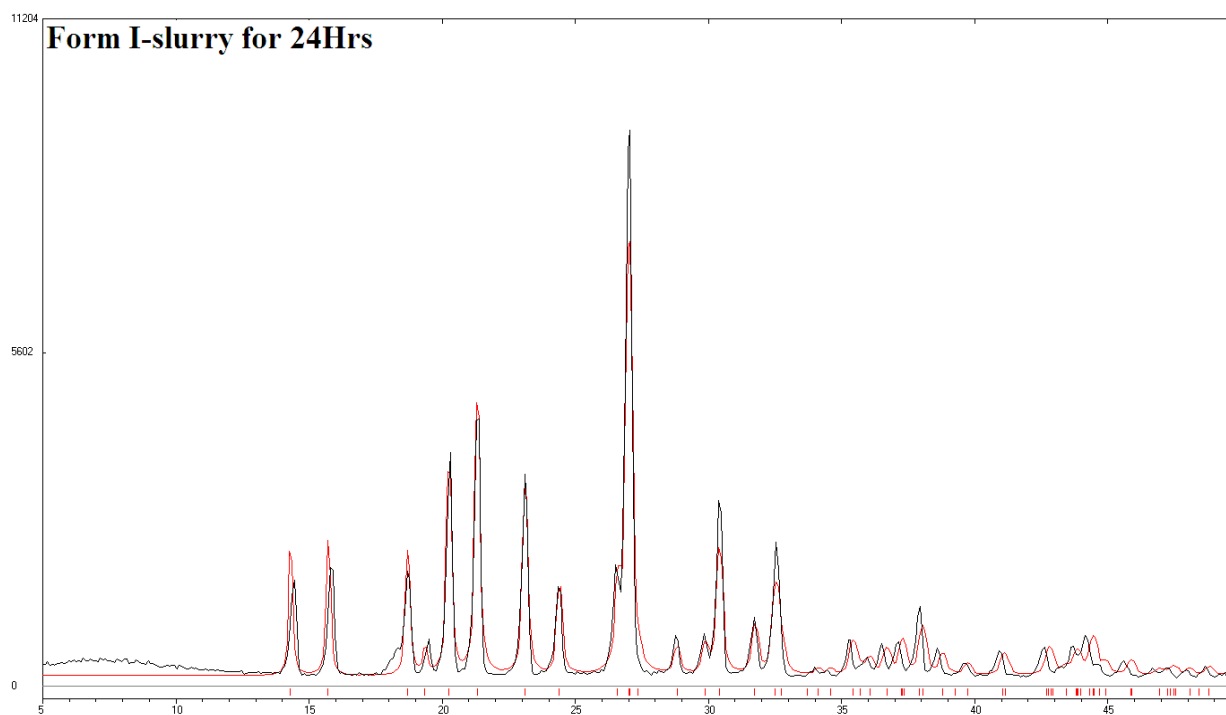

(a)

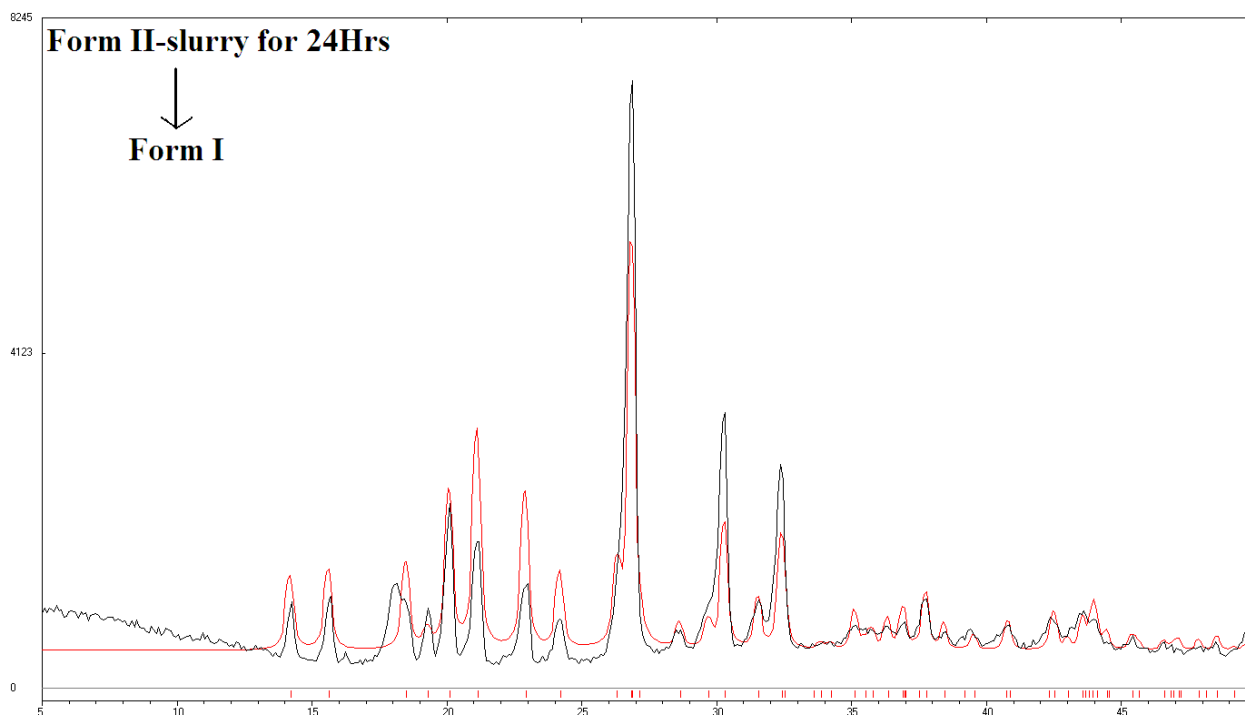

(b)

**Fig. S6** Powder X-ray diffraction pattern after slurry grinding for 24 h. (a) Form I is stable, and (b) form II transforms to stable modification I. The calculated XRD lines of polymorph I (red) are overlay for reference.

**Table S3** Details of CSD searches on SH interactions and Refcodes.

1. Polymorphism in Sulfur compounds having SH group.

|          |          |          |                                                 |
|----------|----------|----------|-------------------------------------------------|
| BOQCUF02 | GLUTAS05 | LCYSTN25 | 5 compounds are polymorphic with 13 hits in CSD |
| BOQCUF04 | LCYSTN04 | TSCARB01 |                                                 |
| BOQCUF05 | LCYSTN21 | WOGRIT01 |                                                 |
| GLUTAS03 | LCYSTN22 |          |                                                 |
| GLUTAS04 | LCYSTN23 |          |                                                 |

2. Sulfur compounds containing neutral S-H...O interaction.

|        |          |         |                       |                                                     |
|--------|----------|---------|-----------------------|-----------------------------------------------------|
| FATQIC | LAPVUU   | TAPZIU* | NALCYS02 <sup>#</sup> | There are 17 and 22 hits in the CSD (no polymorphs) |
| EMANOW | LAWKIE*  | TASPUY* | NALCYS11              |                                                     |
| ESABAB | QECSAU   | TAXMUA  | NALCYS12              |                                                     |
| HUDFIW | OFASOD   | XEHDOF  | NALCYS13              |                                                     |
| HUKJUT | RONVAR01 |         | NALCYS14              |                                                     |
| HUSNEP | RONVEV   |         | NALCYS15              |                                                     |

\*Multi-component systems, <sup>#</sup> Multiple structures of NAC in VT study.

3. S-H...O<sup>-</sup>, S-H...N and N-H...S in polymorphs.

|                           |                           |                           |                                                                                                                                     |
|---------------------------|---------------------------|---------------------------|-------------------------------------------------------------------------------------------------------------------------------------|
| LCYSTN03                  | LCYSTN23 <sup>b,c</sup>   | GLUTAS03 <sup>a,b,c</sup> | S-H...O <sup>-</sup> (5 hits)<br>S-H...N (7 hits)<br>N-H...S (7 hits)<br>Two polymorphic<br>compounds L-cysteine<br>and Glutathione |
| LCYSTN04 <sup>a,b,c</sup> | LCYSTN25 <sup>a,b,c</sup> | GLUTAS04 <sup>a,b,c</sup> |                                                                                                                                     |
| LCYSTN05                  |                           | GLUTAS05 <sup>a,b,c</sup> |                                                                                                                                     |
| LCYSTN21                  |                           | (Glutathione)             |                                                                                                                                     |
| LCYSTN22 <sup>b,c</sup>   |                           |                           |                                                                                                                                     |
| (L-Cysteine)              |                           |                           |                                                                                                                                     |

<sup>a</sup> S-H...O<sup>-</sup>, <sup>b</sup> S-H...N and <sup>c</sup> N-H...S interactions.

4. Acid-amide O-H...O H-bond.

|           |          |          |          |                                               |
|-----------|----------|----------|----------|-----------------------------------------------|
| APENTN02  | GLUTAS05 | VAMBOA01 | MUROXA   | 26 hits were<br>found with five<br>polymorphs |
| BUVKEJ    | GLUTAS06 | VAMBOA02 | MUROXA01 |                                               |
| DETBIO01* | INODUK*  | WEFVIN*  | ACOMUC   |                                               |
| DETBIO10  | INODUK01 | WEFVIN01 | ACOMUC01 |                                               |
| GIZFIF01  | MIMMOL   | WEFVIN02 |          |                                               |
| GLUTAS02* | REKBUE   | YIPFUY01 |          |                                               |
| GLUTAS03  | SHIVOU   |          |          |                                               |
| GLUTAS04  | VAMBOA*  |          |          |                                               |

\*5 polymorphs with catemer synthon

5. Acid-amide N-H...O H-bond.

|          |           |                                       |
|----------|-----------|---------------------------------------|
| APENTN02 | MIMMOL    | Two polymorph pairs out of<br>16 hits |
| BUVKEJ   | PIMBAP04  |                                       |
| DETBIO01 | SIHVOU    |                                       |
| BIHXIA*  | TIPVIY    |                                       |
| BIHXIA01 | ULAWAF    |                                       |
| GLUTAS03 | ULAWAF01  |                                       |
| GLUTAS04 | VAMBOA01* |                                       |
| GLUTAS05 | VAMBOA02  |                                       |

\* Polymorphs
